# Supplementary material for: Plutonium concentrations link soil organic matter decline to wind erosion in ploughed soils of South Africa
Source: Copernicus journal article supplement (doi:10.5194/bg-22-1077-2025), 2025-02-27
Supplement: Supplementary file 1 [file bg-22-1077-2025-supplement.zip]

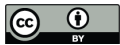

*Supplement of*

**Plutonium concentrations link soil organic matter decline to wind erosion in ploughed soils of South Africa**

**Joel Mohren et al.**

*Correspondence to:* Joel Mohren ([joel.mohren@uni-koeln.de](mailto:joel.mohren@uni-koeln.de))

- [bg-22-1077-2025-supplement-title-page.pdf](#)
- [Mohren\\_et\\_al\\_Supplement\\_v4.docx](#)
- [Supplement\\_Tables\\_S1\\_to\\_S6\\_v4.xlsx](#)

The copyright of individual parts of the supplement might differ from the article licence.
